# Supplementary material for: Discovery of a selective and biologically active low-molecular weight antagonist of human interleukin-1β
Source: PubMed Central journal article supplement (PMC10484922; doi:10.1038/s41467-023-41190-0), 2023-09-07
Supplement: 41467_2023_41190_MOESM5_ESM.pdf [file 41467_2023_41190_MOESM5_ESM.pdf]

## Reporting Summary

Nature Portfolio wishes to improve the reproducibility of the work that we publish. This form provides structure for consistency and transparency in reporting. For further information on Nature Portfolio policies, see our [Editorial Policies](#) and the [Editorial Policy Checklist](#).

### Statistics

For all statistical analyses, confirm that the following items are present in the figure legend, table legend, main text, or Methods section.

n/a Confirmed

- The exact sample size ( $n$ ) for each experimental group/condition, given as a discrete number and unit of measurement
- A statement on whether measurements were taken from distinct samples or whether the same sample was measured repeatedly
- The statistical test(s) used AND whether they are one- or two-sided  
*Only common tests should be described solely by name; describe more complex techniques in the Methods section.*
- A description of all covariates tested
- A description of any assumptions or corrections, such as tests of normality and adjustment for multiple comparisons
- A full description of the statistical parameters including central tendency (e.g. means) or other basic estimates (e.g. regression coefficient) AND variation (e.g. standard deviation) or associated estimates of uncertainty (e.g. confidence intervals)
- For null hypothesis testing, the test statistic (e.g.  $F$ ,  $t$ ,  $r$ ) with confidence intervals, effect sizes, degrees of freedom and  $P$  value noted  
*Give  $P$  values as exact values whenever suitable.*
- For Bayesian analysis, information on the choice of priors and Markov chain Monte Carlo settings
- For hierarchical and complex designs, identification of the appropriate level for tests and full reporting of outcomes
- Estimates of effect sizes (e.g. Cohen's  $d$ , Pearson's  $r$ ), indicating how they were calculated

*Our web collection on [statistics for biologists](#) contains articles on many of the points above.*

### Software and code

Policy information about [availability of computer code](#)

Data collection DA+ data acquisition software implemented at the SLS beamline PX-II  
Bruker TopSpin 3.2

Data analysis  
PRISM 7.0  
Sierra Analyser  
AUTOPROC1.1.7 (20220203)  
autoBUSTER2.11.8 (20220203)  
PHASER 2.8.3  
PHENIX 1.20\_4459  
COOT 0.9.6 EL  
CCPNMR AnalysisAssign 3.1.0  
AnalysisScreen 3.0.4  
nmrglue 0.9  
peakipy: <https://github.com/j-brady/peakipy>  
ChemEx: <https://github.com/gbouvignies/ChemEx>  
FRPipe: <https://github.com/Novartis/FRPipe>

For manuscripts utilizing custom algorithms or software that are central to the research but not yet described in published literature, software must be made available to editors and reviewers. We strongly encourage code deposition in a community repository (e.g. GitHub). See the Nature Portfolio [guidelines for submitting code & software](#) for further information.

## Data

Policy information about [availability of data](#)

All manuscripts must include a [data availability statement](#). This statement should provide the following information, where applicable:

- Accession codes, unique identifiers, or web links for publicly available datasets
- A description of any restrictions on data availability
- For clinical datasets or third party data, please ensure that the statement adheres to our [policy](#)

Diffraction data and crystallographic coordinates of the complex between hIL-1b and compound (S)-2 generated in this study have been deposited in the PDB database under accession code 8C3U [<http://doi.org/10.2210/pdb8C3U/pdb>]. Previously published crystallographic structures used in this study are available from the PDB under accession codes 4DEP [<http://doi.org/10.2210/pdb4DEP/pdb>] (human IL-1b complex with IL-1R1 and IL-1RAcP), 2I1B [<http://doi.org/10.2210/pdb2I1B/pdb>] (unliganded human IL-1b), 2KKI [<http://doi.org/10.2210/pdb2KKI/pdb>] (NMR structure of human IL-1a) and 6P9E [<http://doi.org/10.2210/pdb6P9E/pdb>] (human IL-36g in complex with A-552). The NMR chemical shift assignments generated in this study have been deposited in the BMRB database under accession codes 51919 [<https://dx.doi.org/10.13018/BMR51919>] (hIL-1b at 296 K), 51859 [<https://dx.doi.org/10.13018/BMR51859>] (hIL-1b at 309 K), 51938 [<https://dx.doi.org/10.13018/BMR51938>] (hIL-1b in complex with (S)-2) and 51950 [<https://dx.doi.org/10.13018/BMR51950>] (hIL-1bV47A at 296 K and 309 K). Source data are provided with this paper.

## Human research participants

Policy information about [studies involving human research participants and Sex and Gender in Research](#).

|                             |                                             |
|-----------------------------|---------------------------------------------|
| Reporting on sex and gender | <input type="text" value="not applicable"/> |
| Population characteristics  | <input type="text" value="not applicable"/> |
| Recruitment                 | <input type="text" value="not applicable"/> |
| Ethics oversight            | <input type="text" value="not applicable"/> |

Note that full information on the approval of the study protocol must also be provided in the manuscript.

## Field-specific reporting

Please select the one below that is the best fit for your research. If you are not sure, read the appropriate sections before making your selection.

Life sciences       Behavioural & social sciences       Ecological, evolutionary & environmental sciences

For a reference copy of the document with all sections, see [nature.com/documents/nr-reporting-summary-flat.pdf](https://nature.com/documents/nr-reporting-summary-flat.pdf)

## Life sciences study design

All studies must disclose on these points even when the disclosure is negative.

|                 |                                                                          |
|-----------------|--------------------------------------------------------------------------|
| Sample size     | <input type="text" value="n&gt;=3 for key data points"/>                 |
| Data exclusions | <input type="text" value="No data exclusion"/>                           |
| Replication     | <input type="text" value="All attempts at replication were successful"/> |
| Randomization   | <input type="text" value="Not applicable"/>                              |
| Blinding        | <input type="text" value="Not applicable"/>                              |

## Reporting for specific materials, systems and methods

We require information from authors about some types of materials, experimental systems and methods used in many studies. Here, indicate whether each material, system or method listed is relevant to your study. If you are not sure if a list item applies to your research, read the appropriate section before selecting a response.

## Materials &amp; experimental systems

## Methods

- n/a Involved in the study
- Antibodies
- Eukaryotic cell lines
- Palaeontology and archaeology
- Animals and other organisms
- Clinical data
- Dual use research of concern

- n/a Involved in the study
- ChIP-seq
- Flow cytometry
- MRI-based neuroimaging

## Antibodies

Antibodies used

Validation

## Eukaryotic cell lines

Policy information about [cell lines and Sex and Gender in Research](#)

Cell line source(s)

Authentication

Mycoplasma contamination

Commonly misidentified lines  
(See [ICLAC](#) register)
